# Supplementary material
Source: publisher site journal article supplement (https://www.dovepress.com/article/supplementary_file/533628/Supplementary%20file.xlsx)
Supplement: Supplementary file 1 [file Supplementary%20file.xlsx]

## Sheet: Sheet1
	p-values for Figure 3c	Adjusted P Value
	PBS vs. NP	0.766				p-values for Figure 6c	Adjusted P Value
	PBS vs. TPI1	0.0002				Sham vs. PBS	0.0002
	PBS vs. NP-TPI1	0.0003				Sham vs. NP	0.0005
	PBS vs. NP-TPI1/P	<0.0001				Sham vs. TPI1	<0.0001
	NP vs. TPI1	0.0007				Sham vs. NP-TPI1	<0.0001
	NP vs. NP-TPI1	0.0014				Sham vs. NP-TPI1/P	<0.0001
	NP vs. NP-TPI1/P	0.0002				PBS vs. NP	0.9875
	TPI1 vs. NP-TPI1	0.9862				PBS vs. TPI1	0.4351
	TPI1 vs. NP-TPI1/P	0.8805				PBS vs. NP-TPI1	0.0002
	NP-TPI1 vs. NP-TPI1/P	0.6299				PBS vs. NP-TPI1/P	<0.0001
						NP vs. TPI1	0.1871
	p-values for Figure 3e	Adjusted P Value				NP vs. NP-TPI1	<0.0001
	60min					NP vs. NP-TPI1/P	<0.0001
	PBS vs. NP	0.9984				TPI1 vs. NP-TPI1	0.004
	PBS vs. TPI1	<0.0001				TPI1 vs. NP-TPI1/P	<0.0001
	PBS vs. NP-TPI1	<0.0001				NP-TPI1 vs. NP-TPI1/P	0.1362
	PBS vs. NP-TPI1/P	<0.0001
	NP vs. TPI1	<0.0001
	NP vs. NP-TPI1	<0.0001
	NP vs. NP-TPI1/P	<0.0001				p-values for Figure 6d	Adjusted P Value
	TPI1 vs. NP-TPI1	0.5466				Sham vs. PBS	<0.0001
	TPI1 vs. NP-TPI1/P	0.4057				Sham vs. NP	<0.0001
	NP-TPI1 vs. NP-TPI1/P	>0.9999				Sham vs. TPI1	<0.0001
						Sham vs. NP-TPI1	<0.0001
	180min					Sham vs. NP-TPI1/P	0.0212
	PBS vs. NP	>0.9999				PBS vs. NP	0.2903
	PBS vs. TPI1	<0.0001				PBS vs. TPI1	<0.0001
	PBS vs. NP-TPI1	<0.0001				PBS vs. NP-TPI1	<0.0001
	PBS vs. NP-TPI1/P	<0.0001				PBS vs. NP-TPI1/P	<0.0001
	NP vs. TPI1	<0.0001				NP vs. TPI1	0.0028
	NP vs. NP-TPI1	<0.0001				NP vs. NP-TPI1	<0.0001
	NP vs. NP-TPI1/P	<0.0001				NP vs. NP-TPI1/P	<0.0001
	TPI1 vs. NP-TPI1	0.0262				TPI1 vs. NP-TPI1	0.0003
	TPI1 vs. NP-TPI1/P	0.0079				TPI1 vs. NP-TPI1/P	<0.0001
	NP-TPI1 vs. NP-TPI1/P	>0.9999				NP-TPI1 vs. NP-TPI1/P	0.0003
						p-values for Figure 6e	Adjusted P Value
	p-values for Figure 4b	Adjusted P Value				Sham vs. PBS	<0.0001
	PBS vs. NP	0.7185				Sham vs. NP	<0.0001
	PBS vs. TPI1	0.0061				Sham vs. TPI1	<0.0001
	PBS vs. NP-TPI1	0.0062				Sham vs. NP-TPI1	<0.0001
	PBS vs. NP-TPI1/P	0.0013				Sham vs. NP-TPI1/P	0.02
	NP vs. TPI1	0.0416				PBS vs. NP	0.0664
	NP vs. NP-TPI1	0.042				PBS vs. TPI1	<0.0001
	NP vs. NP-TPI1/P	0.0078				PBS vs. NP-TPI1	<0.0001
	TPI1 vs. NP-TPI1	>0.9999				PBS vs. NP-TPI1/P	<0.0001
	TPI1 vs. NP-TPI1/P	0.8041				NP vs. TPI1	0.0051
	NP-TPI1 vs. NP-TPI1/P	0.8014				NP vs. NP-TPI1	<0.0001
						NP vs. NP-TPI1/P	<0.0001
						TPI1 vs. NP-TPI1	0.0846
	p-values for Figure 4c	Adjusted P Value				TPI1 vs. NP-TPI1/P	<0.0001
	PBS vs. NP	0.0009				NP-TPI1 vs. NP-TPI1/P	0.0009
	PBS vs. TPI1	<0.0001
	PBS vs. NP-TPI1	<0.0001
	PBS vs. NP-TPI1/P	<0.0001				p-values for Figure 6f	Adjusted P Value
	NP vs. TPI1	0.6571				Sham vs. PBS	0.0945
	NP vs. NP-TPI1	0.0726				Sham vs. NP	0.0945
	NP vs. NP-TPI1/P	0.0055				Sham vs. TPI1	<0.0001
	TPI1 vs. NP-TPI1	0.5664				Sham vs. NP-TPI1	<0.0001
	TPI1 vs. NP-TPI1/P	0.0745				Sham vs. NP-TPI1/P	<0.0001
	NP-TPI1 vs. NP-TPI1/P	0.6653				PBS vs. NP	>0.9999
						PBS vs. TPI1	0.01
	p-values for Figure 4d	Adjusted P Value				PBS vs. NP-TPI1	<0.0001
	PBS vs. NP	0.1721				PBS vs. NP-TPI1/P	<0.0001
	PBS vs. TPI1	0.0005				NP vs. TPI1	0.01
	PBS vs. NP-TPI1	<0.0001				NP vs. NP-TPI1	<0.0001
	PBS vs. NP-TPI1/P	<0.0001				NP vs. NP-TPI1/P	<0.0001
	NP vs. TPI1	0.047				TPI1 vs. NP-TPI1	0.0117
	NP vs. NP-TPI1	0.0013				TPI1 vs. NP-TPI1/P	<0.0001
	NP vs. NP-TPI1/P	0.0005				NP-TPI1 vs. NP-TPI1/P	<0.0001
	TPI1 vs. NP-TPI1	0.378
	TPI1 vs. NP-TPI1/P	0.1698
	NP-TPI1 vs. NP-TPI1/P	0.9821				p-values for Figure 6g	Adjusted P Value
						Sham vs. PBS	0.9317
						Sham vs. NP	0.7295
	p-values for Figure 4e	Adjusted P Value				Sham vs. TPI1	0.0067
	PBS vs. NP	>0.9999				Sham vs. NP-TPI1	0.0041
	PBS vs. TPI1	0.1727				Sham vs. NP-TPI1/P	<0.0001
	PBS vs. NP-TPI1	0.0004				PBS vs. NP	0.997
	PBS vs. NP-TPI1/P	0.0003				PBS vs. TPI1	0.0465
	NP vs. TPI1	0.1994				PBS vs. NP-TPI1	0.0293
	NP vs. NP-TPI1	0.0005				PBS vs. NP-TPI1/P	<0.0001
	NP vs. NP-TPI1/P	0.0003				NP vs. TPI1	0.1118
	TPI1 vs. NP-TPI1	0.0374				NP vs. NP-TPI1	0.0727
	TPI1 vs. NP-TPI1/P	0.0271				NP vs. NP-TPI1/P	<0.0001
	NP-TPI1 vs. NP-TPI1/P	0.9998				TPI1 vs. NP-TPI1	0.9999
						TPI1 vs. NP-TPI1/P	<0.0001
						NP-TPI1 vs. NP-TPI1/P	<0.0001
	p-values for Figure 4f	Adjusted P Value
	PBS vs. NP	0.5871
	PBS vs. TPI1	0.011				p-values for Figure 7c	Adjusted P Value
	PBS vs. NP-TPI1	0.0003				Sham vs. PBS	<0.0001
	PBS vs. NP-TPI1/P	<0.0001				Sham vs. NP	<0.0001
	NP vs. TPI1	0.1706				Sham vs. TPI1	<0.0001
	NP vs. NP-TPI1	0.0041				Sham vs. NP-TPI1	<0.0001
	NP vs. NP-TPI1/P	<0.0001				Sham vs. NP-TPI1/P	<0.0001
	TPI1 vs. NP-TPI1	0.3124				PBS vs. NP	0.9051
	TPI1 vs. NP-TPI1/P	0.0057				PBS vs. TPI1	0.3069
	NP-TPI1 vs. NP-TPI1/P	0.2247				PBS vs. NP-TPI1	0.0213
						PBS vs. NP-TPI1/P	<0.0001
						NP vs. TPI1	0.8764
						NP vs. NP-TPI1	0.1825
	p-values for Figure 5d	P value				NP vs. NP-TPI1/P	<0.0001
		0.0095				TPI1 vs. NP-TPI1	0.7635
						TPI1 vs. NP-TPI1/P	0.0007
	p-values for Figure 5g	Adjusted P Value				NP-TPI1 vs. NP-TPI1/P	0.0216
	PBS vs. NP	0.5621
	PBS vs. TPI1	0.0381
	PBS vs. NP-TPI1	0.0003				p-values for Figure 7d	Adjusted P Value
	PBS vs. NP-TPI1/P	<0.0001				Sham vs. PBS	<0.0001
	NP vs. TPI1	0.3644				Sham vs. NP	<0.0001
	NP vs. NP-TPI1	0.0024				Sham vs. TPI1	<0.0001
	NP vs. NP-TPI1/P	<0.0001				Sham vs. NP-TPI1	<0.0001
	TPI1 vs. NP-TPI1	0.0425				Sham vs. NP-TPI1/P	<0.0001
	TPI1 vs. NP-TPI1/P	0.0003				PBS vs. NP	0.8736
	NP-TPI1 vs. NP-TPI1/P	0.0407				PBS vs. TPI1	0.0412
						PBS vs. NP-TPI1	<0.0001
	p-values for Figure 5i	Adjusted P Value				PBS vs. NP-TPI1/P	<0.0001
	PBS vs. NP	0.1599				NP vs. TPI1	0.338
	PBS vs. TPI1	0.0049				NP vs. NP-TPI1	<0.0001
	PBS vs. NP-TPI1	<0.0001				NP vs. NP-TPI1/P	<0.0001
	PBS vs. NP-TPI1/P	<0.0001				TPI1 vs. NP-TPI1	<0.0001
	NP vs. TPI1	0.2213				TPI1 vs. NP-TPI1/P	<0.0001
	NP vs. NP-TPI1	0.0015				NP-TPI1 vs. NP-TPI1/P	0.0018
	NP vs. NP-TPI1/P	<0.0001
	TPI1 vs. NP-TPI1	0.0447
	TPI1 vs. NP-TPI1/P	0.0002				p-values for Figure 7f	Adjusted P Value
	NP-TPI1 vs. NP-TPI1/P	0.0188				Sham vs. PBS	<0.0001
						Sham vs. NP	<0.0001
						Sham vs. TPI1	<0.0001
						Sham vs. NP-TPI1	<0.0001
						Sham vs. NP-TPI1/P	<0.0001
						PBS vs. NP	0.376
						PBS vs. TPI1	<0.0001
						PBS vs. NP-TPI1	<0.0001
						PBS vs. NP-TPI1/P	<0.0001
						NP vs. TPI1	0.0092
						NP vs. NP-TPI1	<0.0001
						NP vs. NP-TPI1/P	<0.0001
						TPI1 vs. NP-TPI1	0.1087
						TPI1 vs. NP-TPI1/P	<0.0001
						NP-TPI1 vs. NP-TPI1/P	0.0071
